# Supplementary material for: Plant genomic resources at National Genomics Data Center: assisting in data-driven breeding applications
Source: PubMed Central journal article supplement (PMC10987443; doi:10.1007/s42994-023-00134-4), 2024-02-02

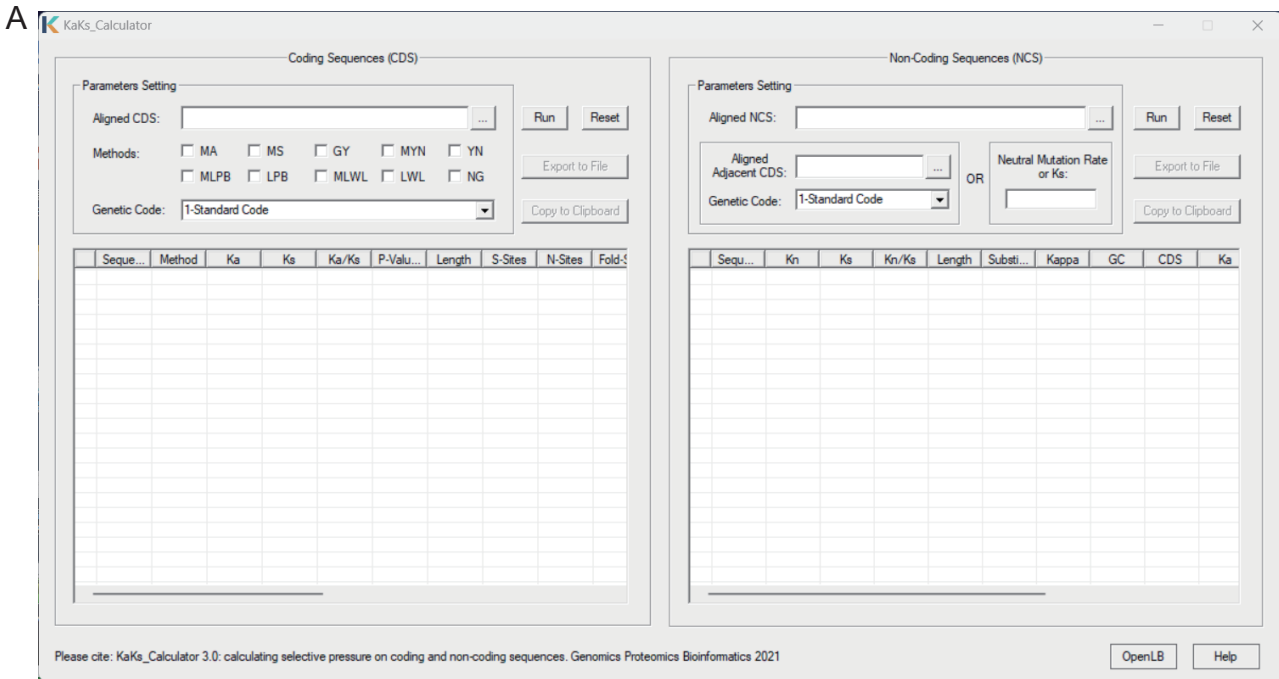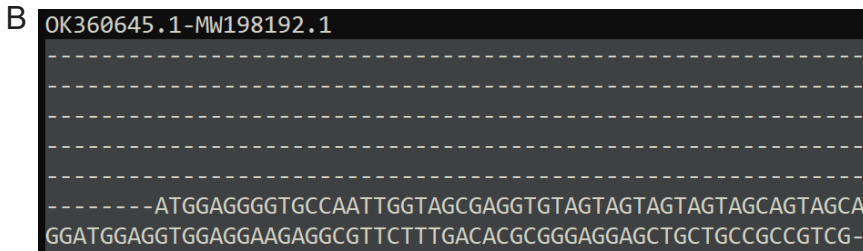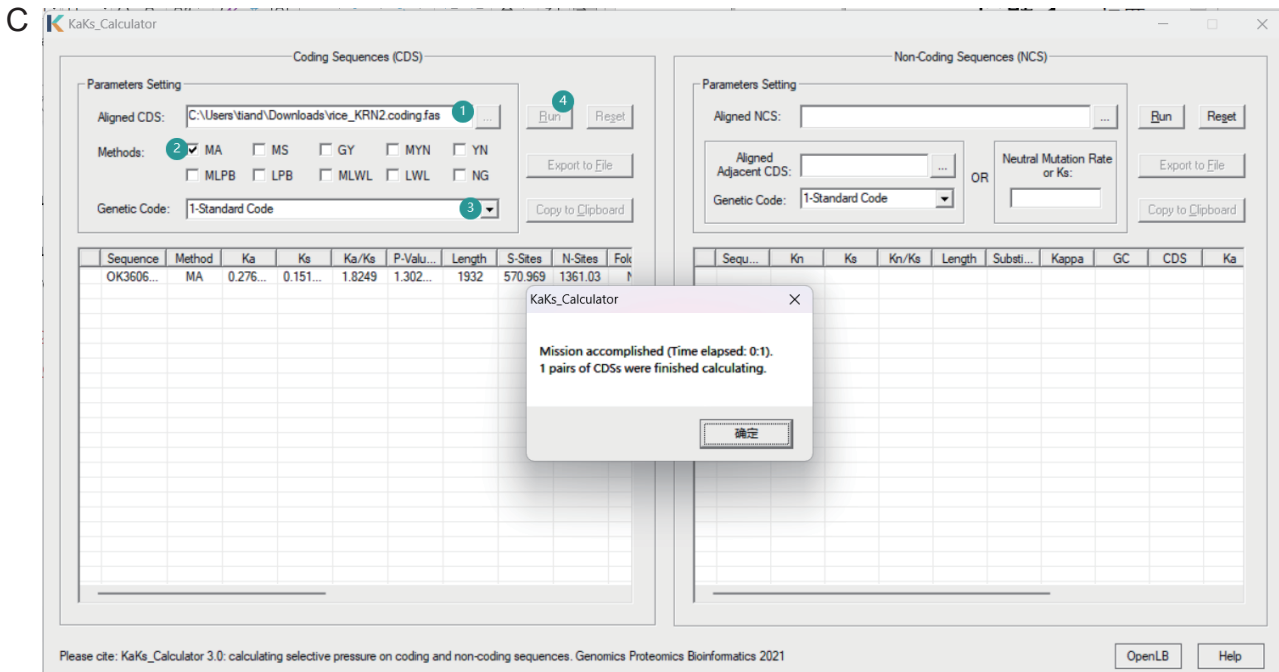

Supplement: 42994_2023_134_MOESM2_ESM.pdf [file 42994_2023_134_MOESM2_ESM.pdf]
